# Supplementary material for: Arfaptin-1 Negatively Regulates Arl1-Mediated Retrograde Transport
Source: PubMed Central journal article supplement (PMC4366199; doi:10.1371/journal.pone.0118743), 2015-03-19
Supplement: pone.0118743.s004.pdf [file pone.0118743.s004.pdf]

Differential affinity chromatography with immobilized GST-Ar11 (GST-Ar11Q71L and GST-Ar11T31N)

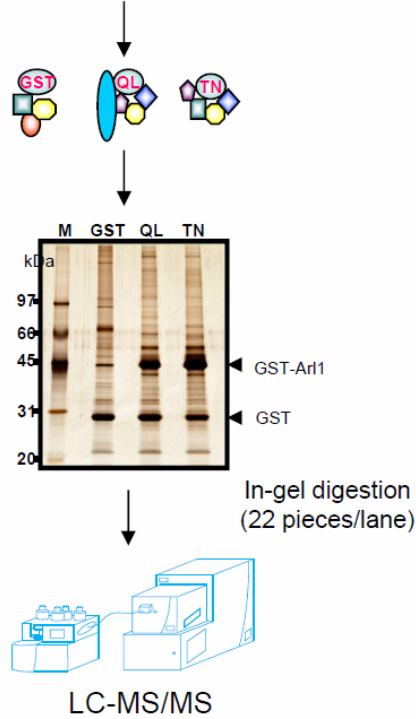

Database search using Mascot algorithm

Identification probability analysis by Scaffold 2 software (peptide thresholds >95.0%; protein thresholds >95.0%, and 2 peptides minimum)

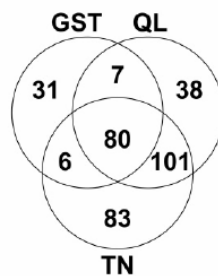

Ar11 specific interaction proteins

S1 Fig.
