# Supplementary material for: Arfaptin-1 Negatively Regulates Arl1-Mediated Retrograde Transport
Source: PubMed Central journal article supplement (PMC4366199; doi:10.1371/journal.pone.0118743), 2015-03-19

**A**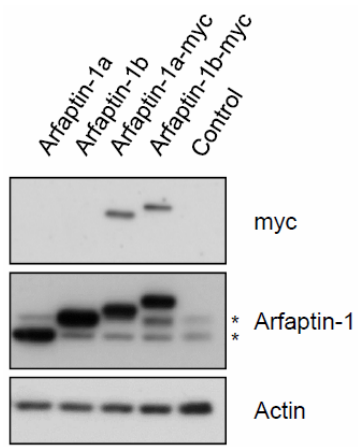**B**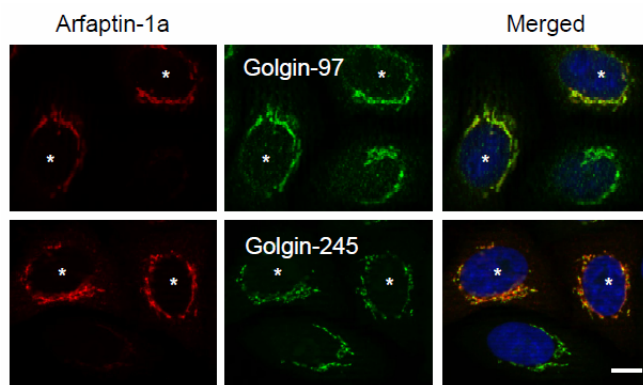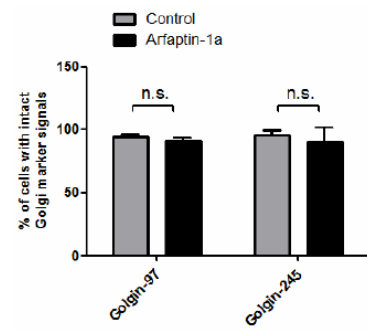**C**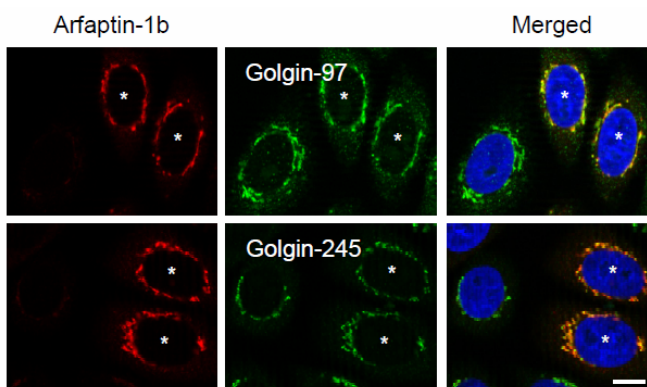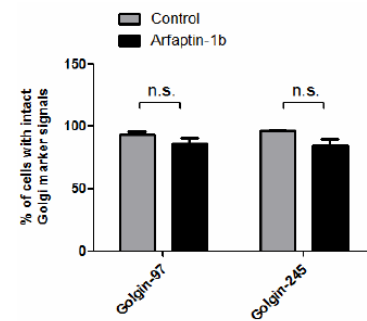

Supplement: pone.0118743.s010.pdf [file pone.0118743.s010.pdf]
